# Supplementary material
Source: Royal Society of Chemistry journal article supplement (doi:10.1039/d6ta00020g)
Supplement: d6ta00020g1.pdf [file d6ta00020g1.pdf]

# **Synergistic Enhancement of Strength and Ductility in Crosslinked Polymer Binders for High-Stability Silicon Anodes in Lithium-Ion Batteries**

Junho Kim<sup>†a</sup>, Gyuri Kim<sup>†b</sup>, Ji Young Kim<sup>a</sup>, Sohyun Kim<sup>a</sup>, Hyunjun Lee<sup>b</sup>, Youngho Eom<sup>b</sup> In Hwan Jung<sup>\*b</sup> and Hansu Kim<sup>\*a</sup>

<sup>a</sup> Department of Energy Engineering, Hanyang University, 17 Haengdang-dong Seongdong-gu, Seoul 04763, Republic of Korea

<sup>b</sup> Department of Organic and Nano Engineering, and Human-Tech Convergence Program, Hanyang University, 222 Wangsimni-ro, Seongdong-gu, Seoul 04763, Republic of Korea.

\*Corresponding author.

*E-mail address:* inhjung@hanyang.ac.kr (I.H.Jung), khansu@hanyang.ac.kr (H.Kim)

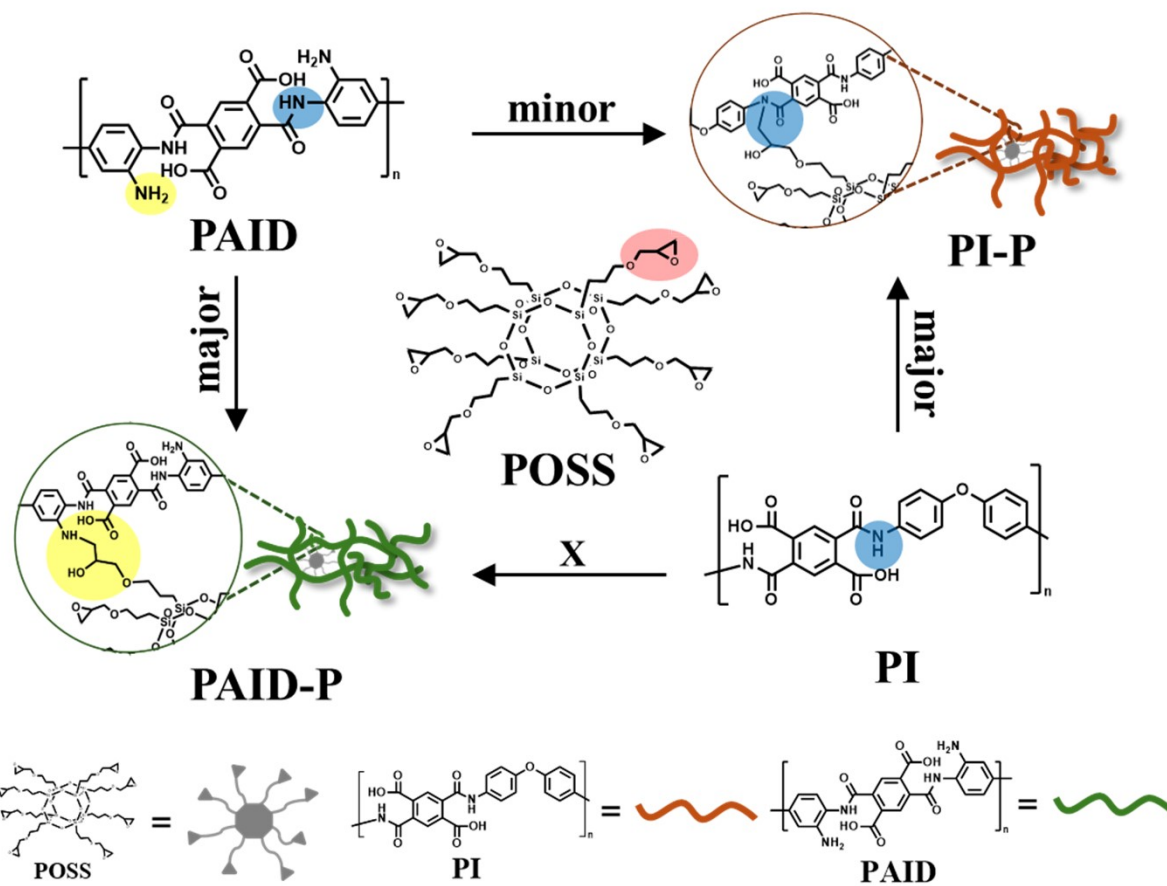

Scheme S1. Synthesis procedure and reaction mechanism of PI-P and PAID-P.

### Molecular Weight Averages

| Peak # | RT (min) | Mp (g/mol) | Mn (g/mol) | Mw (g/mol) | Mz (g/mol) | Mz+1 (g/mol) | PD       |
|--------|----------|------------|------------|------------|------------|--------------|----------|
| 1      | 8.936    | 2989174    | 4526102    | 5400193    | 6784917    | 8717337      | 1.193122 |

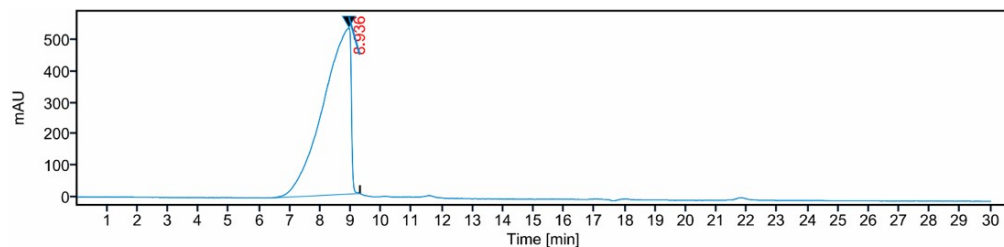

Fig. S1. Gel permeation chromatography graph of PI.

### Molecular Weight Averages

| Peak # | RT (min) | Mp (g/mol) | Mn (g/mol) | Mw (g/mol) | Mz (g/mol) | Mz+1 (g/mol) | PD       |
|--------|----------|------------|------------|------------|------------|--------------|----------|
| 1      | 7.656    | 9240107    | 2629594    | 7672238    | 11935118   | 14534083     | 2.917651 |

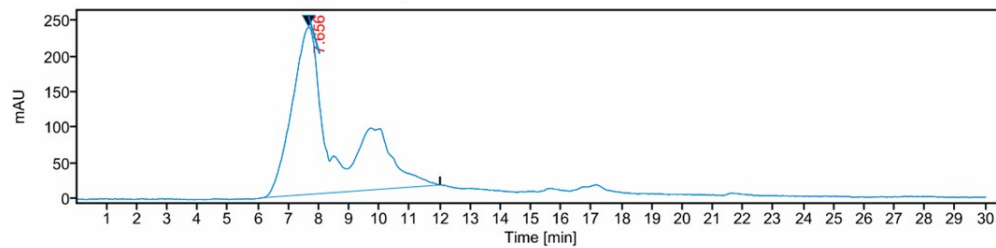

Fig. S2. Gel permeation chromatography graph of PAID.

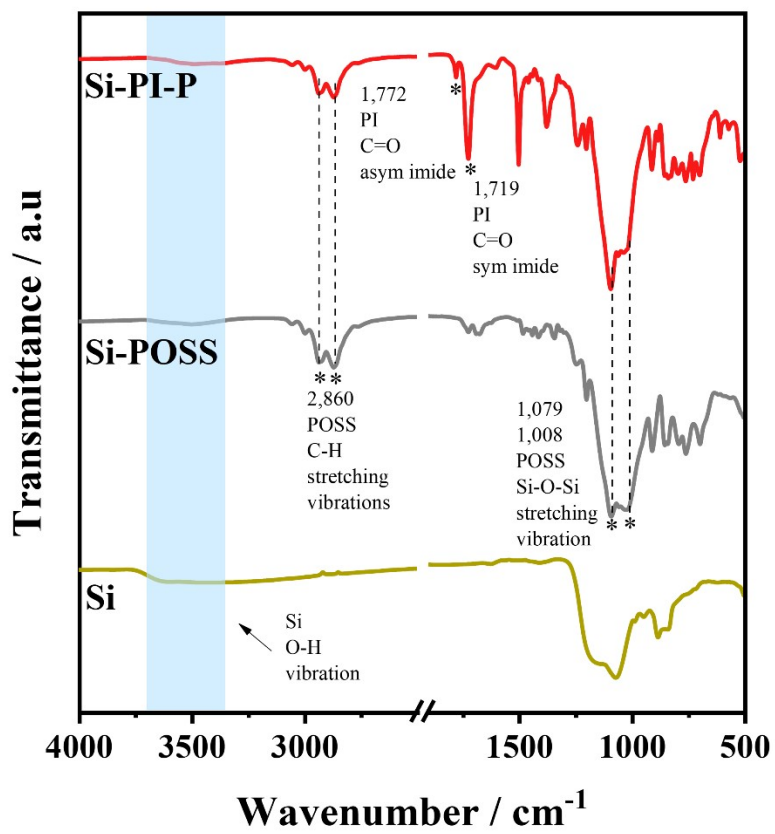

Fig. S3. FT-IR spectra of PI-P binder and POSS cross-linker with Si particles.

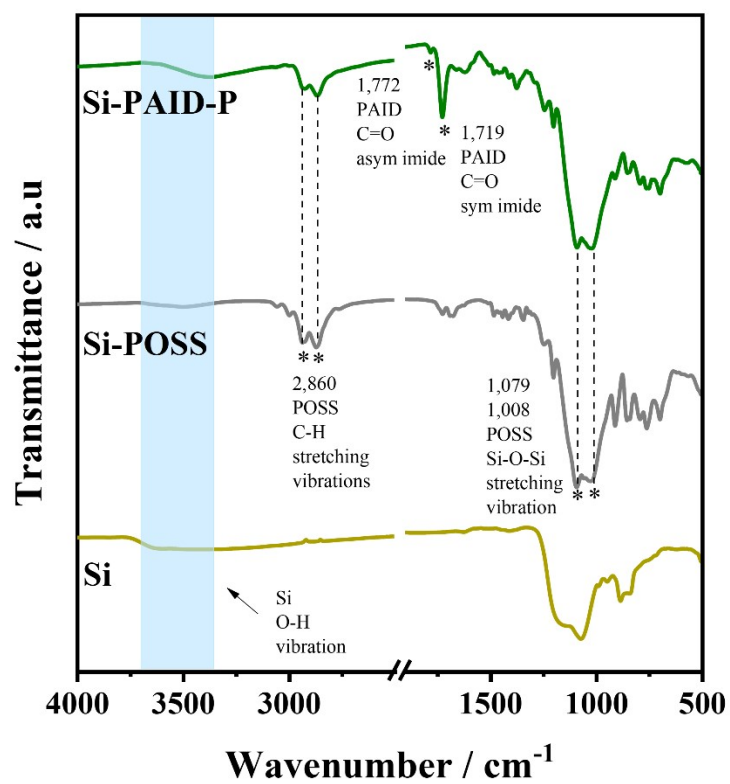

Fig. S4. FT-IR spectra of PAID-P binder and POSS cross-linker with Si particles.

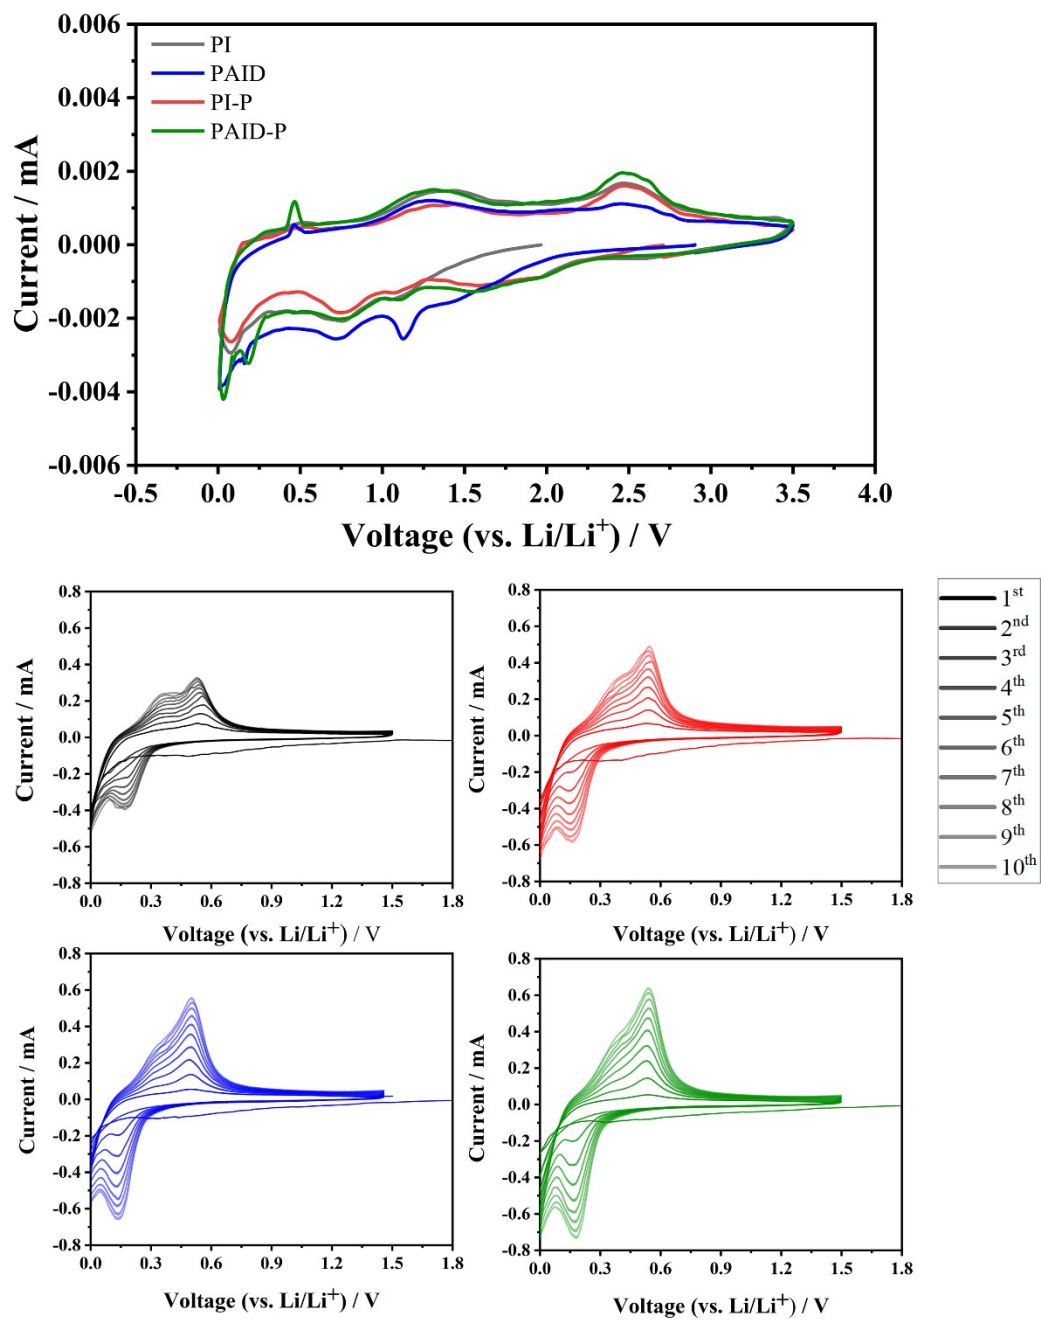

Fig. S5. Cyclic voltammogram of Si anodes with PI, PAID, PI-P, and PAID-P at a scan rate of  $10 \mu\text{V s}^{-1}$ .

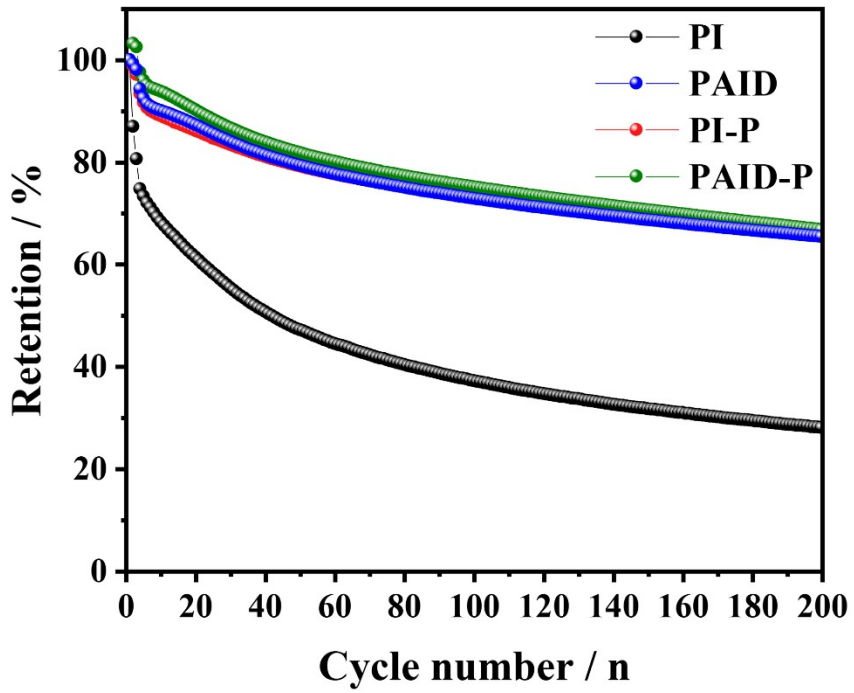

Fig. S6. Capacity retention values of Si anode depend on different binders at current density of 0.2C.

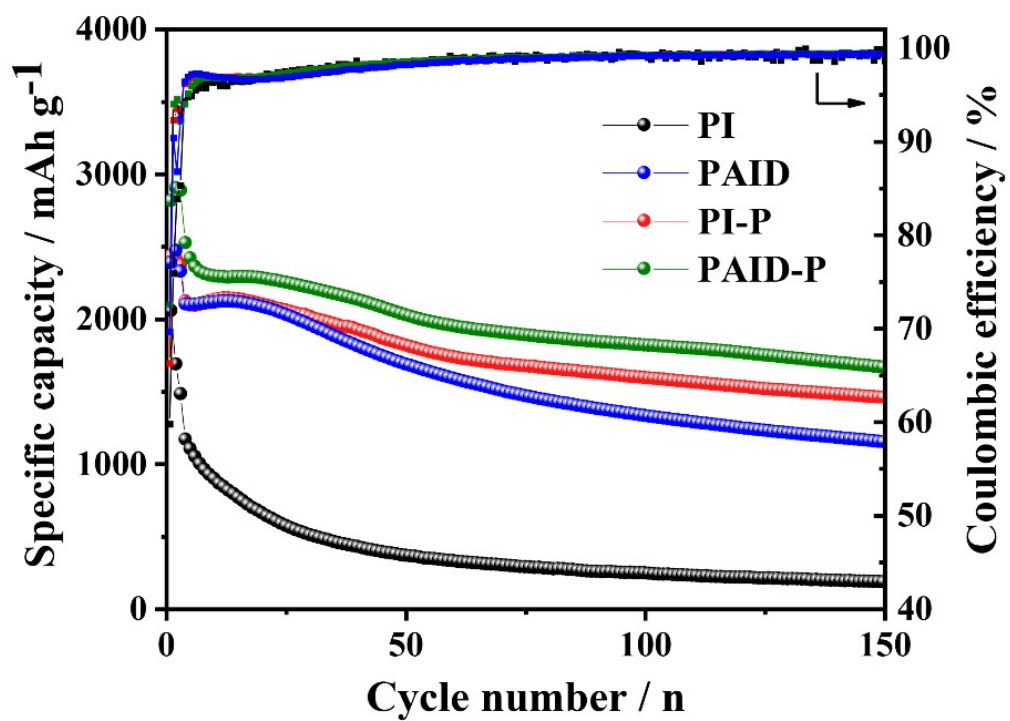

Fig. S7. Electrochemical cycle performance Si anode depends on different binders at different current density of 1C.

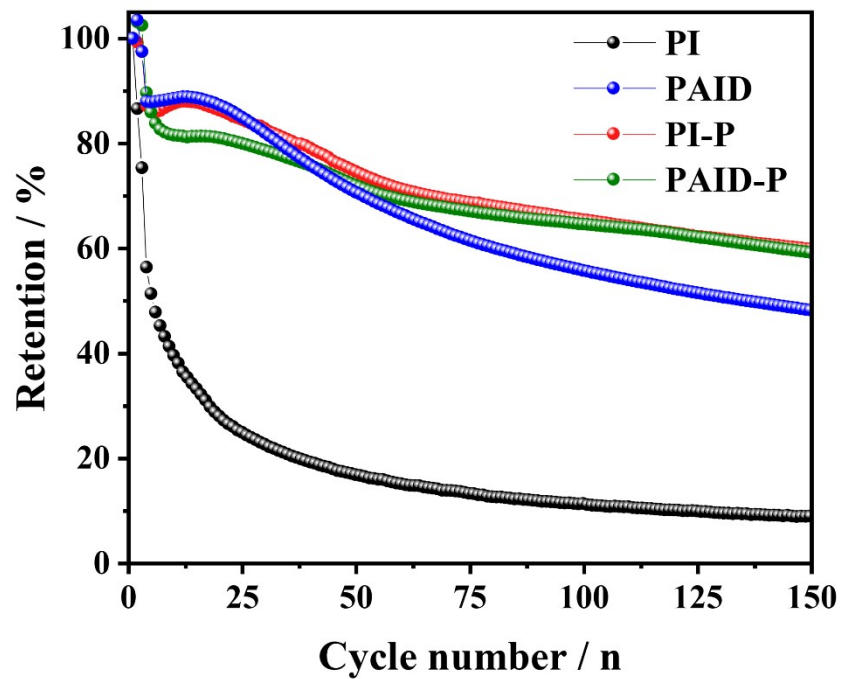

Fig. S8. Capacity retention values of Si anode depend on different binders at current density of 1C.

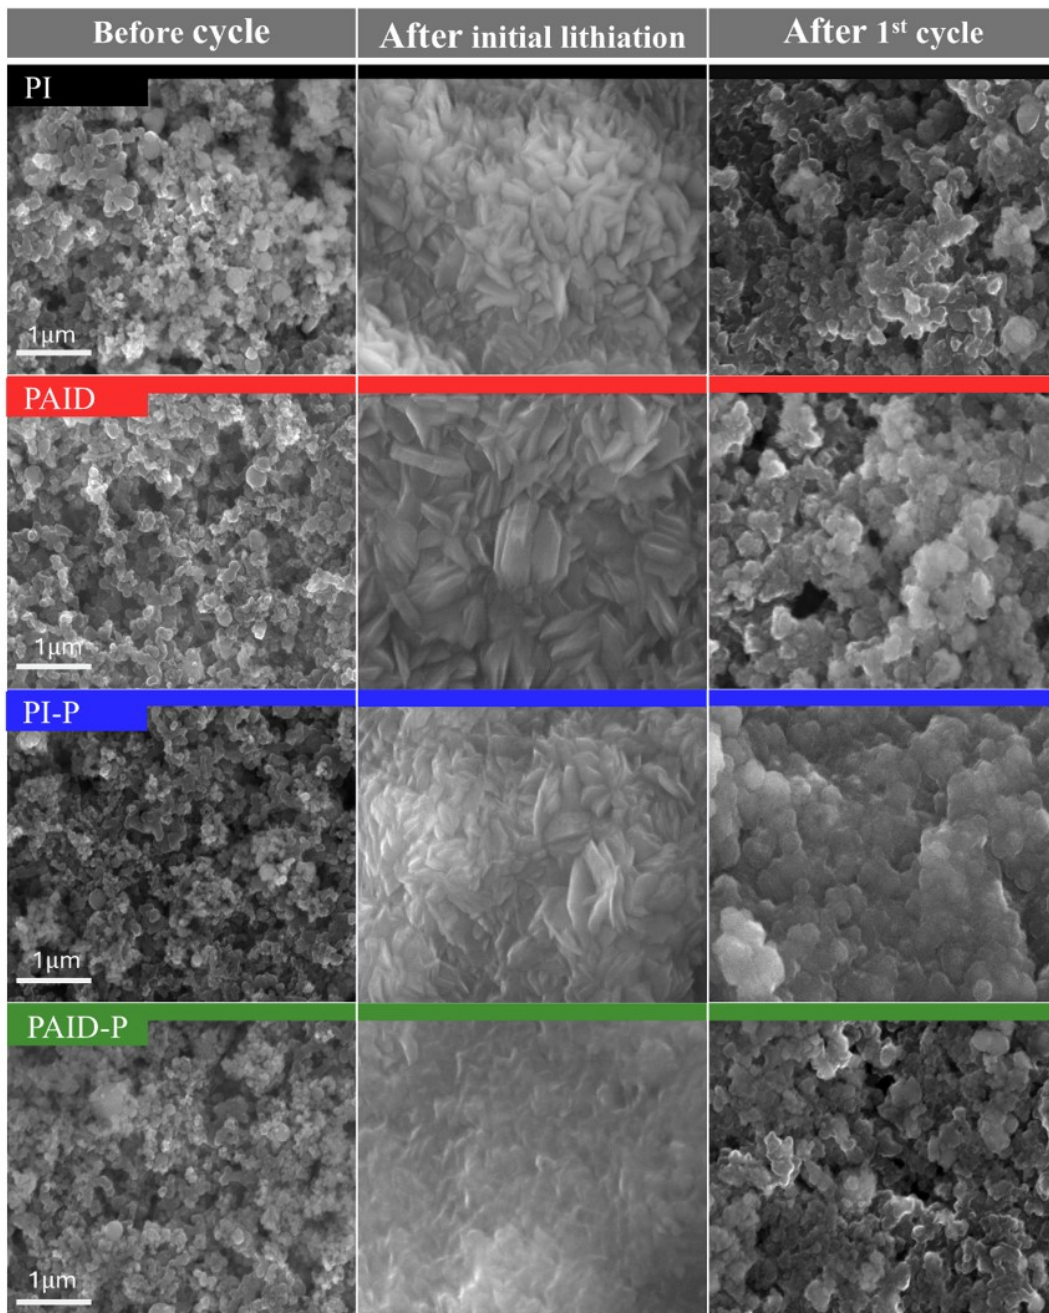

Fig. S9. Top-viewed SEM images of PI-Si anode, PAID-Si anode, PI-P-Si anode, and PAID-P-Si anode before cycling, after initial lithiation, and after 1<sup>st</sup> cycle.

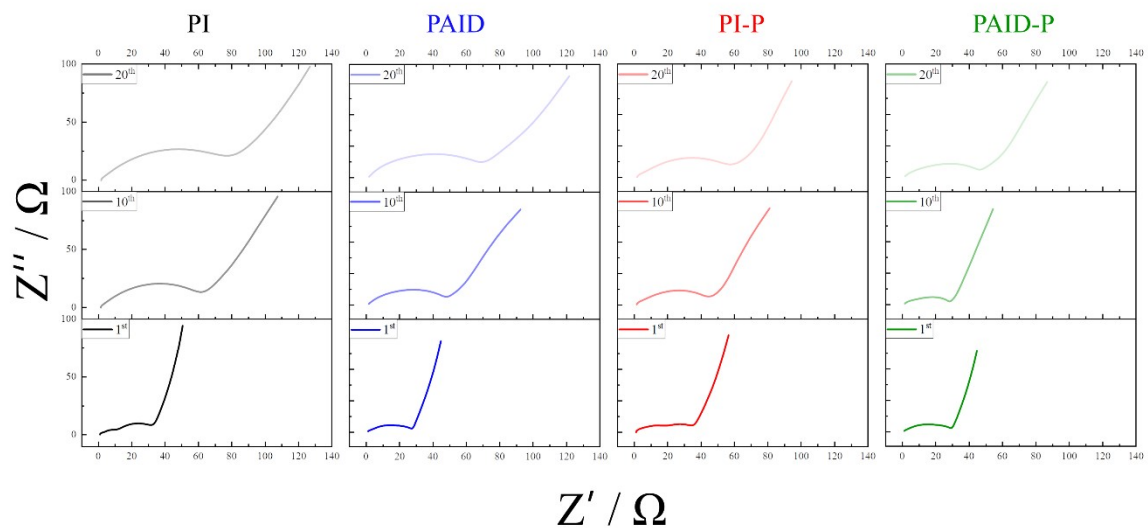

Fig. S10. Nyquist plots of Si anode depending on different polymer binders at different cycles.

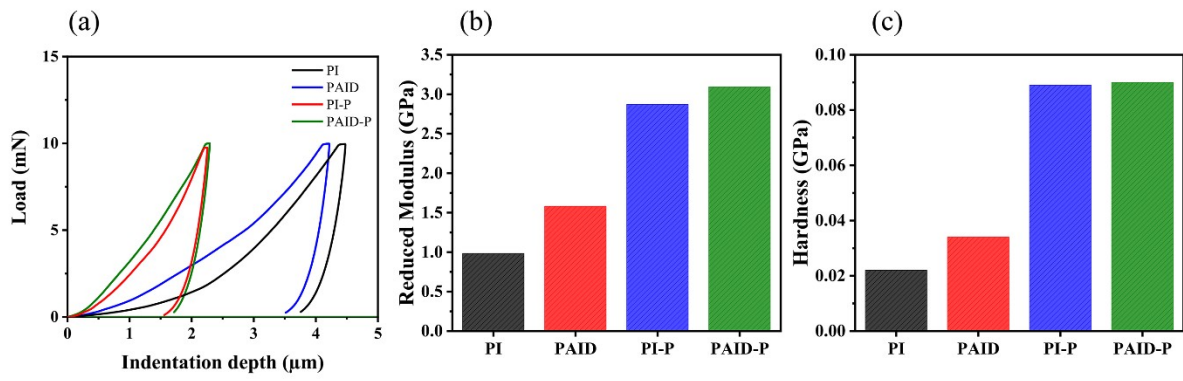

Fig. S11. (a) Nanoindentation profiles of the Si anodes with PI, PAID, PI-P, PAID-P binders. (b) Reduced modulus and (c) hardness of Si anode with different binders.

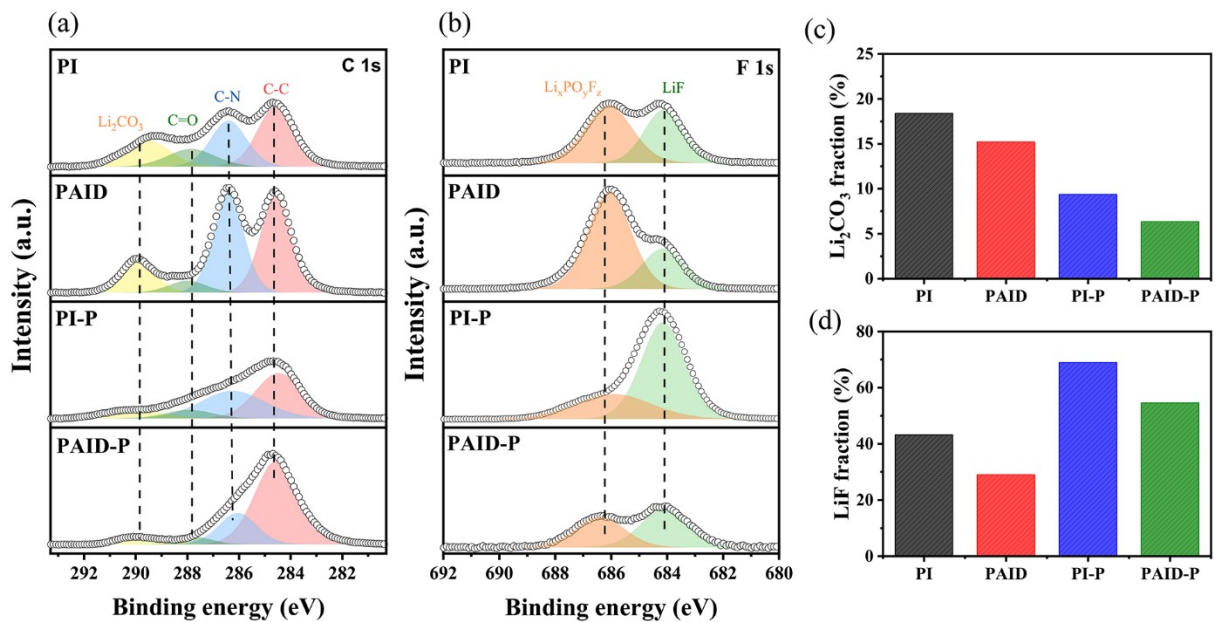

Fig. S12. XPS analysis on the SEI composite of the Si anodes with different binders. (a) C 1s, (b) F 1s spectra; (c)  $\text{Li}_2\text{CO}_3$  fraction; and (d) LiF fraction of the cycled PI, PAID, PI-P, PAID-P Si anode after 200 cycles under 0.2C at 25°C.

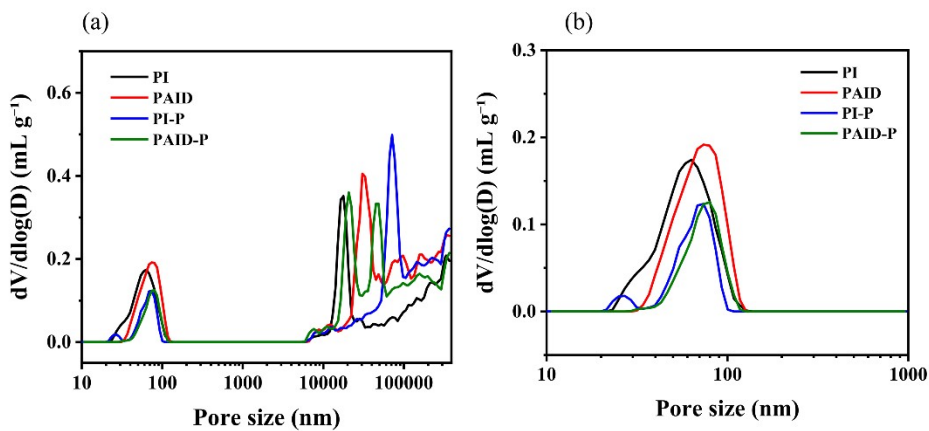

Fig. S13. Pore size distribution of Si anodes with different binders measured by mercury intrusion porosimetry. (a) Full-range pore size distribution and (b) magnified view in the small pore region, comparing PI, PAID, PI-P, and PAID-P based Si anodes.

| <b>Binder</b> | <b>Peel test</b><br>Average force / <i>N</i> | <b>SAICAS</b><br>Average force / <i>N</i> |
|---------------|----------------------------------------------|-------------------------------------------|
| PI            | 1.1                                          | 0.10                                      |
| PAID          | 3.9                                          | 0.16                                      |
| PI-P          | 4.2                                          | 0.25                                      |
| PAID-P        | 5.4                                          | 0.30                                      |

Table S1. Average force of peel test and SAICAS for composite electrodes depend on binders.

| <b>Binder</b> | <b>Reduced modulus(GPa)</b> | <b>Hardness (GPa)</b> | <b>Indentation depth (<math>\mu\text{m}</math>)</b> |
|---------------|-----------------------------|-----------------------|-----------------------------------------------------|
| PI            | 0.983                       | 0.022                 | 4.44                                                |
| PAID          | 1.58                        | 0.034                 | 4.18                                                |
| PI-P          | 2.872                       | 0.089                 | 2.24                                                |
| PAID-P        | 3.093                       | 0.09                  | 2.26                                                |

Table S2. Reduced modulus, hardness indentation depth for composite electrodes depend on binders.

|      |                                                  | <b>PI</b>    | <b>PAID</b>  | <b>PI-P</b>  | <b>PAID-P</b> |
|------|--------------------------------------------------|--------------|--------------|--------------|---------------|
| C 1s | C-C                                              | 60885.94     | 86045.84     | 57838.50     | 99205.11      |
|      | C-N                                              | 45244.46     | 83627.44     | 49083.75     | 32927.34      |
|      | C=O                                              | 27062.55     | 12286.61     | 11223.58     | 6370.76       |
|      | Li <sub>2</sub> CO <sub>3</sub>                  | 30088.58     | 32647.89     | 12211.51     | 9383.27       |
|      | <b>Li<sub>2</sub>CO<sub>3</sub><br/>Fraction</b> | <b>18.4%</b> | <b>15.2%</b> | <b>9.37%</b> | <b>6.34%</b>  |
| F 1s | LiF                                              | 74605.07     | 61713.19     | 229447.26    | 13553.51      |
|      | Li <sub>x</sub> PO <sub>y</sub> F <sub>z</sub>   | 98172.92     | 150771.54    | 103185.07    | 11260.57      |
|      | <b>LiF fraction</b>                              | <b>43.2%</b> | <b>29.0%</b> | <b>69.0%</b> | <b>54.6%</b>  |

Table S3. XPS analysis on the SEI composite of the Si anodes with different binders.

|                                     | <b>PI</b> | <b>PAID</b> | <b>PI-P</b> | <b>PAID-P</b> |
|-------------------------------------|-----------|-------------|-------------|---------------|
| Total pore area (m <sup>2</sup> /g) | 4.519     | 3.712       | 2.056       | 1.733         |
| Median pore diameter (μm)           | 0.05282   | 0.06101     | 0.06455     | 0.07163       |
| Avg pore diameter (μm)              | 0.1988    | 0.3598      | 0.5151      | 0.6491        |
| Porosity (%)                        | 23.42     | 27.63       | 5.15        | 19.75         |

Table S4. Pore structure parameters of different samples obtained from mercury intrusion porosimetry

| Binder    | Active material | Current density       | Initial discharge capacity | Cycle performance                           | polyimide-derivatives             | Ref.             |
|-----------|-----------------|-----------------------|----------------------------|---------------------------------------------|-----------------------------------|------------------|
| P84       | SiNP (30nm)     | 0.2 A g <sup>-1</sup> | 2392 mAh g <sup>-1</sup>   | 1313 mAh g <sup>-1</sup> after 300 cycles   | copolyimide                       | 1                |
| PI-COOH   | SiNP (<60nm)    | 0.5 A g <sup>-1</sup> | 2557.9 mAh g <sup>-1</sup> | 809 mAh g <sup>-1</sup> after 100 cycles    | carboxyl-functionalized polyimide | 2                |
| NTPI-COOH | SiNP (<60nm)    | 0.5 A g <sup>-1</sup> | 2611.6 mAh g <sup>-1</sup> | 1252.2 mAh g <sup>-1</sup> after 100 cycles | carboxyl-functionalized polyimide | 3                |
| API       | SiNP (50nm)     | 2 A g <sup>-1</sup>   | 2695 mAh g <sup>-1</sup>   | 1444 mAh g <sup>-1</sup> after 200 cycles   | Adenine-Derived Polyimide         | 4                |
| PAID20    | SiNP (100nm)    | 0.2 C                 | 2663 mAh g <sup>-1</sup>   | 1792 mAh g <sup>-1</sup> after 200 cycles   | copolyimide                       | 5                |
| PAID-P    | SiNP (100nm)    | 0.2 C                 | 2820.6 mAh g <sup>-1</sup> | 1881 mAh g <sup>-1</sup> after 200 cycles   | Crosslinking polyimide            | <i>This work</i> |

Table S5. Comparison of cycling performance between the PAID-P and previously reported polyimide-derivatives binders for Si anodes.

## References

1. J. Choi, K. Kim, J. Jeong, K. Y. Cho, M.-H. Ryou and Y. M. Lee, *Acs Appl Mater Inter*, 2015, 7, 14851-14858.
2. Y. Xu, Q. Zhang, N. Lv, H. Li, Z. Wei, Y. Wang and H. Tang, *Energ Fuel*, 2023, 37, 2441-2448.
3. P. Du, H. Zhou, Y. Xu and Y. Wang, *ACS Omega*, 2026.
4. W. Tan, B. Liang, M. Chen, Z. Song, M. Yi, J. Hu, K. Zeng and G. Yang, *ACS Applied Energy Materials*, 2023, 6, 10723-10733.
5. J. Kim, G. Kim, Y. K. Park, G. Lim, S. T. Kim, I. H. Jung and H. Kim, *Advanced Functional Materials*, 2023, 33, 2303810.
